# Supplementary material
Source: HighWire-hosted journal article supplement (https://qualitysafety.bmj.com/highwire/filestream/160638/field_highwire_adjunct_files/0/bmjqs-2021-013427supp001_data_supplement.pdf)
Supplement: bmjqs-2021-013427supp001_data_supplement.pdf [file bmjqs-2021-013427supp001_data_supplement.pdf]

## Supplementary file 1

## Evaluating the safety of mental health related prescribing in UK primary care: a cross-sectional study using the Clinical Practice Research Datalink (CPRD)

## Prescribing safety indicators with their operational definitions

| No                                                  | Prescribing safety indicator                                                                                                                                                                            | Patients at risk of triggering the prescribing safety indicator (denominator)                                                                                                                                                             | Patients triggered the prescribing safety indicator (numerator)                                                                                                                                                                                                                        |
|-----------------------------------------------------|---------------------------------------------------------------------------------------------------------------------------------------------------------------------------------------------------------|-------------------------------------------------------------------------------------------------------------------------------------------------------------------------------------------------------------------------------------------|----------------------------------------------------------------------------------------------------------------------------------------------------------------------------------------------------------------------------------------------------------------------------------------|
| <b>Antipsychotic</b>                                |                                                                                                                                                                                                         |                                                                                                                                                                                                                                           |                                                                                                                                                                                                                                                                                        |
| P1                                                  | Prescribing antipsychotic with a QT-prolonging drug                                                                                                                                                     | Prescribed any antipsychotic within the 6 months leading up to the audit date                                                                                                                                                             | Prescribed any QT prolonging drug within the 6 months leading up to the audit date                                                                                                                                                                                                     |
| P2                                                  | Risperidone prescribed to a patient with dementia and without psychotic illness for more than 6 weeks                                                                                                   | Has a Read code for dementia before the 6 months leading up to the audit date and no read code for psychosis within the 9 months leading up to the audit date and prescribed risperidone within the 6 months leading up to the audit date | Prescribed risperidone for more than 6 weeks within the 6 months leading up to the audit date                                                                                                                                                                                          |
| P3                                                  | Prescribing more than one regular antipsychotic for 3 months or more, excluding clozapine augmentation                                                                                                  | Prescribed more than one regular antipsychotic within the 6 months leading up to the audit date                                                                                                                                           | Prescribed more than one regular antipsychotics for 3 months or more within the 6 months leading up to the audit date                                                                                                                                                                  |
| P4                                                  | Antipsychotic other than quetiapine, aripiprazole or clozapine prescribed to a patient with Parkinson's disease or with Lewy Body Disease                                                               | Has a Read code for Parkinson's disease or Lewy Body Disease before the 6 months leading up to the audit date and prescribed any antipsychotic within the 6 months leading up to the audit date                                           | Prescribed antipsychotic other than quetiapine, aripiprazole or clozapine within the 6 months leading up to the audit date                                                                                                                                                             |
| M1                                                  | Antipsychotic prescribed for at least 12 months without monitoring glucose, weight, or lipid profile within the previous year                                                                           | Prescribed any antipsychotic between the 12-24 months leading up to the audit date and again within the 12 months leading up to the audit date                                                                                            | <b>M1a:</b> Have not had glucose test within the 12 months leading up to the audit date<br><b>M1b:</b> Have not had weight recorded within the 12 months leading up to the audit date<br><b>M1c:</b> Have not had lipid profile test within the 12 months leading up to the audit date |
| M2                                                  | Initiation of haloperidol without monitoring ECG at baseline                                                                                                                                            | Prescribed haloperidol within the 6 months leading up to the audit date and not prescribed haloperidol in the 6-12 months before the audit date                                                                                           | Have not had ECG monitoring within the 9 months leading up to the audit date                                                                                                                                                                                                           |
| <b>Antidepressant</b>                               |                                                                                                                                                                                                         |                                                                                                                                                                                                                                           |                                                                                                                                                                                                                                                                                        |
| P5                                                  | Selective serotonin reuptake inhibitor (SSRI) or serotonin and norepinephrine reuptake inhibitor (SNRI) prescribed with an NSAID or antiplatelet agent to a patient without gastrointestinal protection | Prescribed any SSRI or SNRI AND Prescribed antiplatelet or NSAID within the 6 months leading up to the audit date                                                                                                                         | Not prescribed gastroprotection within the 6 months leading up to the audit date.                                                                                                                                                                                                      |
| P6                                                  | SSRI or SNRI prescribed with a direct oral anticoagulant (DOAC) or warfarin                                                                                                                             | Prescribed SSRI or SNRI within the 6 months leading up to the audit date                                                                                                                                                                  | Prescribed warfarin or DOAC concurrently with SSRI or SNRI during the quarter<br>Prescribed warfarin or DOAC within the 6 months leading up to the audit date.                                                                                                                         |
| P7                                                  | Prescribing citalopram, escitalopram, TCA or trazadone with QT-prolonging drugs                                                                                                                         | Prescribed citalopram, escitalopram, TCA or trazadone within the 6 months leading up to the audit date                                                                                                                                    | Prescribed any QT prolonging drug within the 6 months leading up to the audit date                                                                                                                                                                                                     |
| P8                                                  | SSRI or SNRI prescribed to a patient with a history of peptic ulcer or bleeding disorders without gastroprotection                                                                                      | Has a Read code for peptic ulcer or bleeding disorders before the 6 months leading up to the audit date and prescribed SSRI or SNRI within the 6 months leading up to the audit date.                                                     | Not prescribed gastroprotection within the 6 months leading up to the audit date                                                                                                                                                                                                       |
| <b>Sedative, hypnotic and anxiolytic Indicators</b> |                                                                                                                                                                                                         |                                                                                                                                                                                                                                           |                                                                                                                                                                                                                                                                                        |

|                        |                                                                                                                                                                                                                                            |                                                                                                                                                                                                                             |                                                                                                                                                                                     |
|------------------------|--------------------------------------------------------------------------------------------------------------------------------------------------------------------------------------------------------------------------------------------|-----------------------------------------------------------------------------------------------------------------------------------------------------------------------------------------------------------------------------|-------------------------------------------------------------------------------------------------------------------------------------------------------------------------------------|
| <b>P9</b>              | Any sedative-hypnotic prescribed to a patient with a history of falls                                                                                                                                                                      | Has a Read code for falls before the 6 months leading up to the audit date                                                                                                                                                  | Prescribed any sedative-hypnotic within the 6 months leading up to the audit date                                                                                                   |
| <b>P10</b>             | Benzodiazepine, Z-drug or sedating antihistamine prescribed to a patient with dementia or cognitive impairment                                                                                                                             | Has a Read code for dementia before the 6 months leading up to the audit date                                                                                                                                               | Prescribed benzodiazepine, Z-drug or sedating antihistamine within the 6 months leading up to the audit date                                                                        |
| <b>P11</b>             | Benzodiazepine or Z-drug prescribed to a patient aged $\geq 65$ years                                                                                                                                                                      | Aged $\geq 65$ before the 6 months leading up to the audit date                                                                                                                                                             | Prescribed benzodiazepine or Z-drug within the 6 months leading up to the audit date                                                                                                |
| <b>P12</b>             | Benzodiazepine or Z-drug prescribed to a patient with asthma, COPD or sleep apnoea                                                                                                                                                         | Has a Read code for asthma, COPD or sleep apnoea before the 6 months leading up to the audit date                                                                                                                           | Prescribed benzodiazepine or Z-drug within the 6 months leading up to the audit date                                                                                                |
| <b>Mood stabiliser</b> |                                                                                                                                                                                                                                            |                                                                                                                                                                                                                             |                                                                                                                                                                                     |
| <b>P13</b>             | Valproic acid prescribed to a woman of childbearing potential                                                                                                                                                                              | Female, aged $\geq 15$ before the 6 months leading up to the audit date and $\leq 49$ years before the 6 months leading up to the audit date                                                                                | Prescribed valproic acid within the 6 months leading up to the audit date                                                                                                           |
| <b>P14</b>             | Prescribing lithium with an ACEi/ARB or a diuretic                                                                                                                                                                                         | Prescribed lithium within the 6 months leading up to the audit date                                                                                                                                                         | Prescribed ACEi/ARB or a diuretic within the 6 months leading up to the audit date                                                                                                  |
| <b>M3</b>              | Prescribing lithium without monitoring lithium plasma levels within the previous 6 months or within the last 3 months if the patient is aged $\geq 65$ years or have a diagnosis of renal impairment or during the first year of treatment | <b>M3a:</b> Prescribed lithium in the 6-12 months leading up to the audit date and again in the 6 months leading up to the audit date                                                                                       | Have not had lithium level testing within the 6 months leading up to the audit date                                                                                                 |
|                        |                                                                                                                                                                                                                                            | <b>M3b:</b> Aged $\geq 65$ before the 6 months leading up to the audit date and prescribed lithium in the 3-6 months leading up to the audit date and again in the 3 months leading up to the audit date                    | Have not had lithium level testing in the 3 months leading up to the audit date                                                                                                     |
|                        |                                                                                                                                                                                                                                            | <b>M3c:</b> Prescribed in the 3-6 months leading up to the audit date and again in the 3 months leading up to the audit date and NOT prescribed lithium in the 12-18 months leading up to the audit date                    | Have not had lithium level testing in the 3 months leading up to the audit date                                                                                                     |
|                        |                                                                                                                                                                                                                                            | <b>M3d:</b> Prescribed lithium in the 3-6 months leading up to the audit date and again in the 3 months leading up to the audit date and has a Read code for renal impairment before the 6 months leading up to audit date. | Have not had lithium level testing in the 3 months leading up to the audit date                                                                                                     |
| <b>M4</b>              | Lithium prescribed for at least 6 months without monitoring U&Es or thyroid function within the last 6 months                                                                                                                              | Lithium prescribed in the 6-12 months leading up to the audit date and again within the 6 months leading up to the audit date                                                                                               | <b>M4a:</b> Have not had U&E testing in the 6 months leading up to the audit date<br><b>M4b:</b> Have not had thyroid function testing in the 6 months leading up to the audit date |
| <b>Anticholinergic</b> |                                                                                                                                                                                                                                            |                                                                                                                                                                                                                             |                                                                                                                                                                                     |
| <b>P15</b>             | A medication with medium/high anticholinergic activity prescribed to a patient with dementia or cognitive impairment                                                                                                                       | Has a Read code for dementia or cognitive impairment before the 6 months leading up to audit date                                                                                                                           | Prescribed any medication with medium/high anticholinergic activity within the 6 months leading up to audit date.                                                                   |
| <b>P16</b>             | Mental health related medication with medium/high anticholinergic activity prescribed with another medication with medium/high anticholinergic activity                                                                                    | Prescribed mental health related medication with medium/high anticholinergic activity before the 6 months leading up to audit date                                                                                          | Prescribed any medication with medium/high anticholinergic activity within the 6 months leading up to audit date.                                                                   |
| <b>P17</b>             | Mental health related medication with medium/high anticholinergic activity prescribed to a patient with a history of urinary retention or benign prostatic hyperplasia                                                                     | Has a Read code for urinary retention or benign prostatic hyperplasia before the 6 months leading up to audit date                                                                                                          | Prescribed mental health related medication with medium/high anticholinergic activity before the 6 months leading up to audit date                                                  |
| <b>Other</b>           |                                                                                                                                                                                                                                            |                                                                                                                                                                                                                             |                                                                                                                                                                                     |
| <b>P18</b>             | Four or more psychotropics prescribed to a patient for more than 3 months                                                                                                                                                                  | Prescribed 4 psychotropics within the 6 months leading up to the audit date                                                                                                                                                 | Prescribed 4 or more psychotropics for 3 months within the 6 months leading up to the audit date                                                                                    |
